# Supplementary material for: The Specific Binding and Promotion Effect of Azoles on Human Aldo-Keto Reductase 7A2
Source: MDPI journal article supplement (doi:10.3390/metabo13050601), 2023-04-27
Supplement: s1 [file s1]

## **Supplementary data**

### **The specific binding and promotion effect of azoles to human aldo-keto reductase 7A2**

Wanying Wu<sup>a,b,c,1</sup>, Tianqing Jiang<sup>a,b,c,1</sup>, Haihui Lin<sup>a,b,c</sup>, Chao Chen<sup>a,b,c</sup>, Lingling

Wang<sup>a,b,c</sup>, Jikai Wen<sup>a,b,c</sup>, Jun Wu<sup>a,b,c,\*</sup>, Yiqun Deng<sup>a,b,c,\*</sup>

<sup>a</sup> Guangdong Provincial Key Laboratory of Protein Function and Regulation in  
Agricultural Organisms, College of Life Sciences, South China Agricultural  
University, Guangzhou 510642, Guangdong, China

<sup>b</sup> Guangdong Laboratory for Lingnan Modern Agriculture, Guangzhou 510642,  
Guangdong, China

<sup>c</sup> Key Laboratory of Zoonosis of Ministry of Agriculture and Rural Affairs, South  
China Agricultural University, Guangzhou 510642, Guangdong, China

<sup>1</sup>These authors contributed equally to this work.

\* Corresponding author, e-mail: yqdeng@scau.edu.cn, wujun@scau.edu.cn; Tel./Fax:

+86-20-3860-4967

**Contents:**

**Figure S1.** The cluster distribution of econazole docking into AKR7A2.

**Figure S2.** The cluster distribution of fluconazole docking into AKR7A2.

**Figure S3.** The cluster distribution of itraconazole docking into AKR7A2.

**Figure S4.** The cluster distribution of ketoconazole docking into AKR7A2.

**Figure S5.** The cluster distribution of miconazole docking into AKR7A2.

**Figure S6.** The cluster distribution of posaconazole docking into AKR7A2.

**Figure S7.** The cluster distribution of voriconazole docking into AKR7A2.

**Figure S8.** The Michaelis-Menten equation fittings of SSA catalyzed by AKR7A2 in the absence or presence of voriconazole.

**Figure S9** The interactions of posaconazole with the residues in the substrate pocket.

**Figure S10** The hydrogen bonds between the azoles and the residues in AKR7A2.

**Table S1.** Kinetic parameters of effect of voriconazole on AKR7A2 enzyme activity with SSA as a substrate



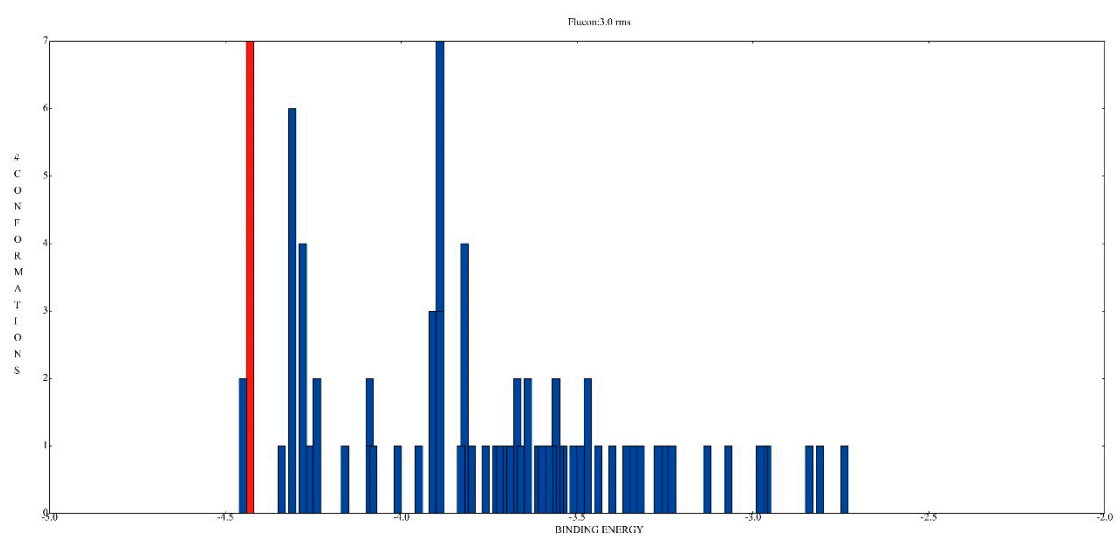

**Figure S2** The cluster distribution of fluconazole docking into AKR7A2.  
The red column represents some conformers binding at the entrance of the substrate pocket

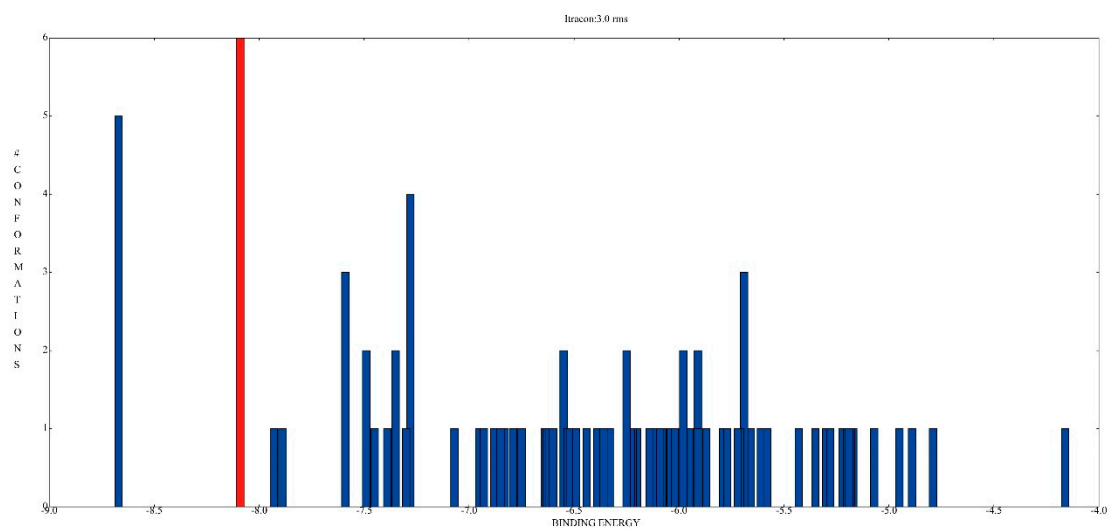

**Figure S3** The cluster distribution of itraconazole docking into AKR7A2.

The red column represents some conformers binding at the entrance of the substrate pocket

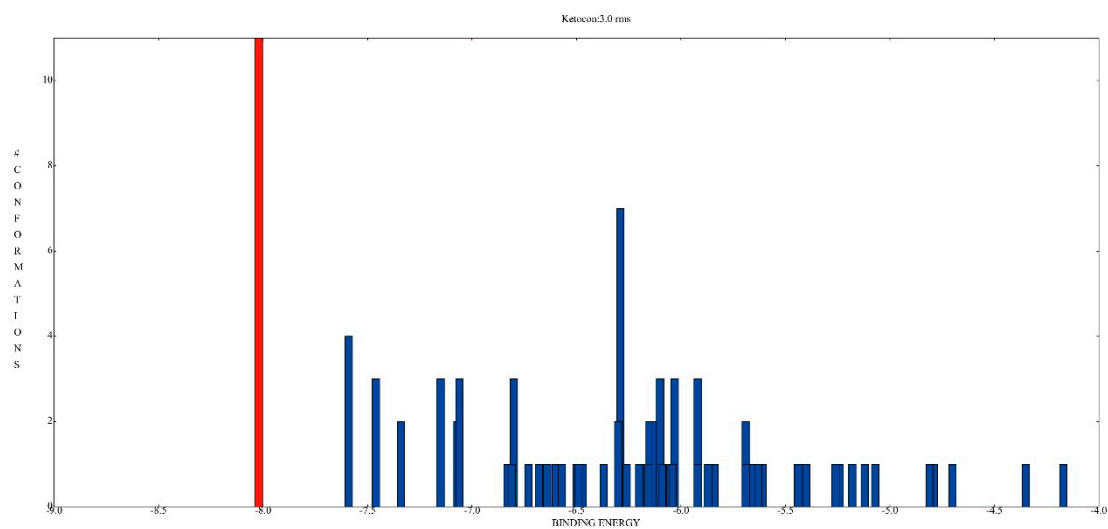

**Figure S4** The cluster distribution of ketoconazole docking into AKR7A2.  
The red column represents the conformers binding at the entrance of the substrate pocket

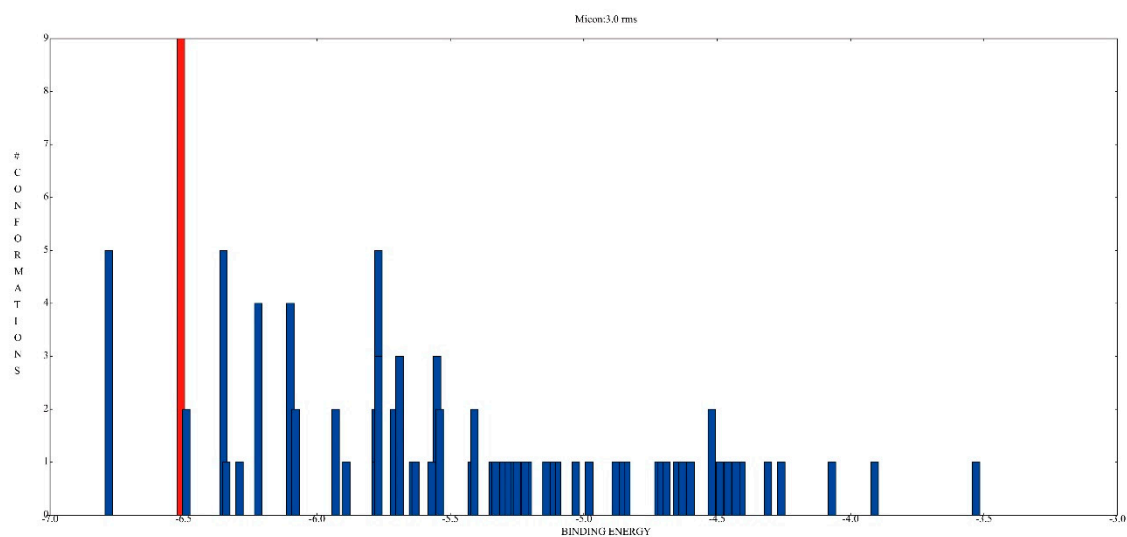

**Figure S5** The cluster distribution of miconazole docking into AKR7A2.  
The red column represents some conformers binding at the entrance of the substrate pocket

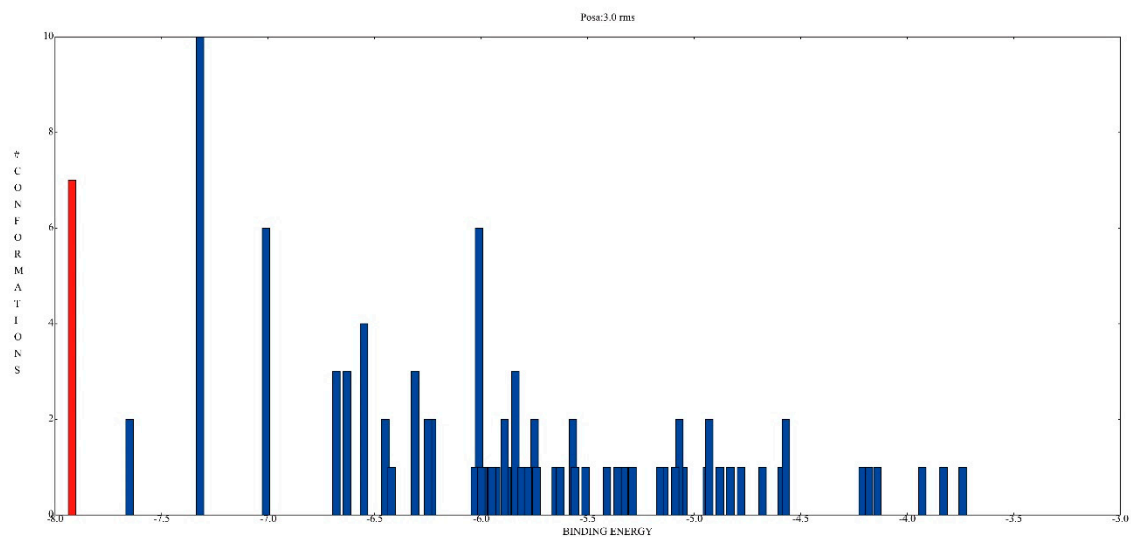

**Figure S6** The cluster distribution of posaconazole docking into AKR7A2.

The red column represents the conformers binding at the entrance of the substrate pocket



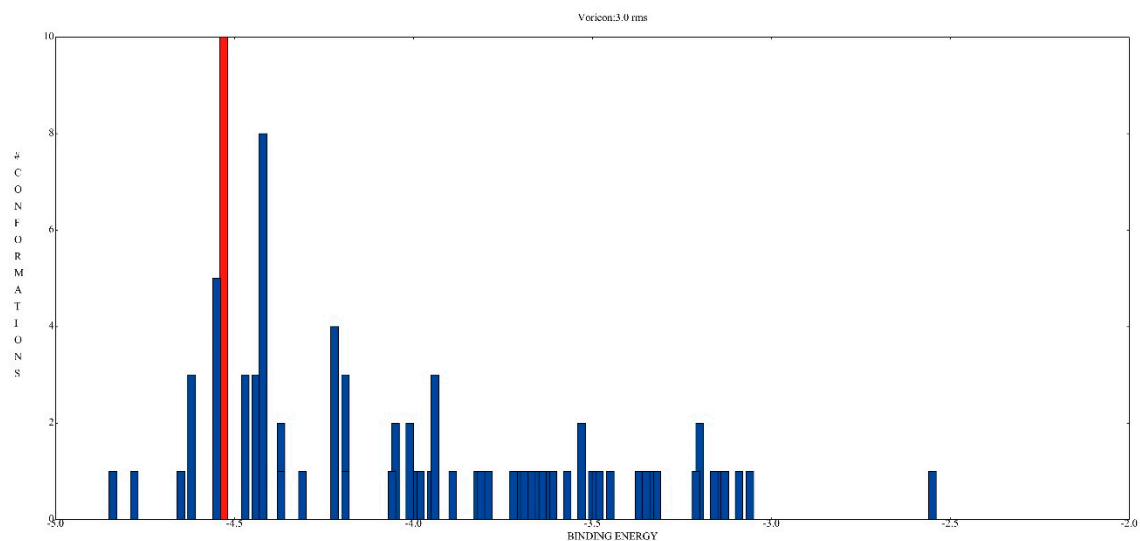

**Figure S7** The cluster distribution of voriconazole docking into AKR7A.  
 The red column represents the conformers binding at the entrance of the substrate  
 pocket

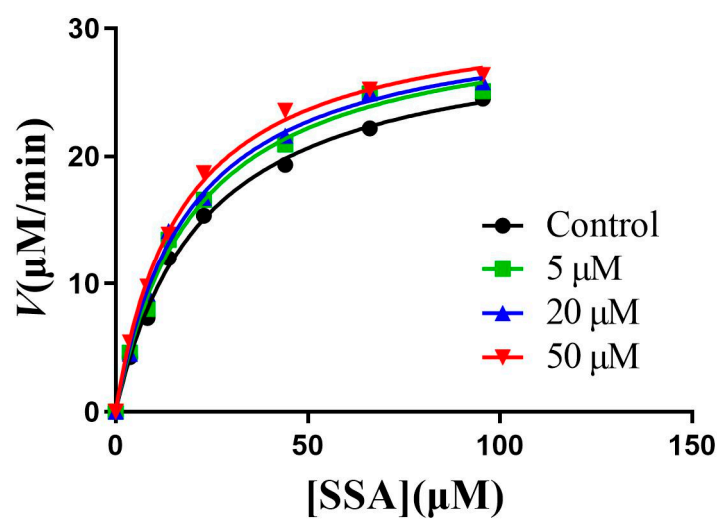

**Figure S8** The Michaelis-Menten equation fittings of SSA catalyzed by AKR7A2 in the absence or presence of voriconazole

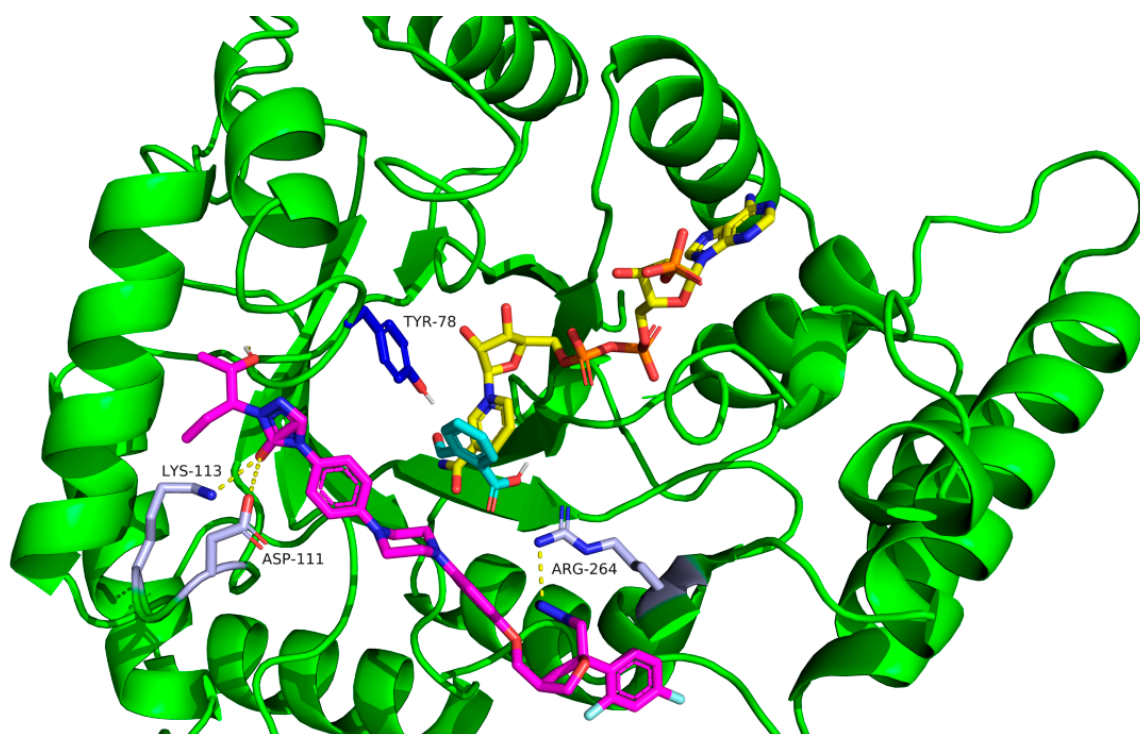

**Figure S9** The interactions of posaconazole with the residues in the substrate pocket.

The simulations were performed with flexible docking by setting Tyr-78 as the flexible residue. Protein backbones are represented as green ribbon format. 2-CBA is depicted in cyan sticks, NADPH is depicted in yellow sticks, and posaconazole is depicted in purple sticks. The active center Tyr-78 residue is depicted in blue sticks.

Color scheme: red for oxygen atoms, blue for nitrogen atoms, and orange for phosphorus atom. Hydrogen bonds are shown as yellow dashed lines. Asp-111, Lys-113, and Arg-264 can form hydrogen bonds with posaconazole.

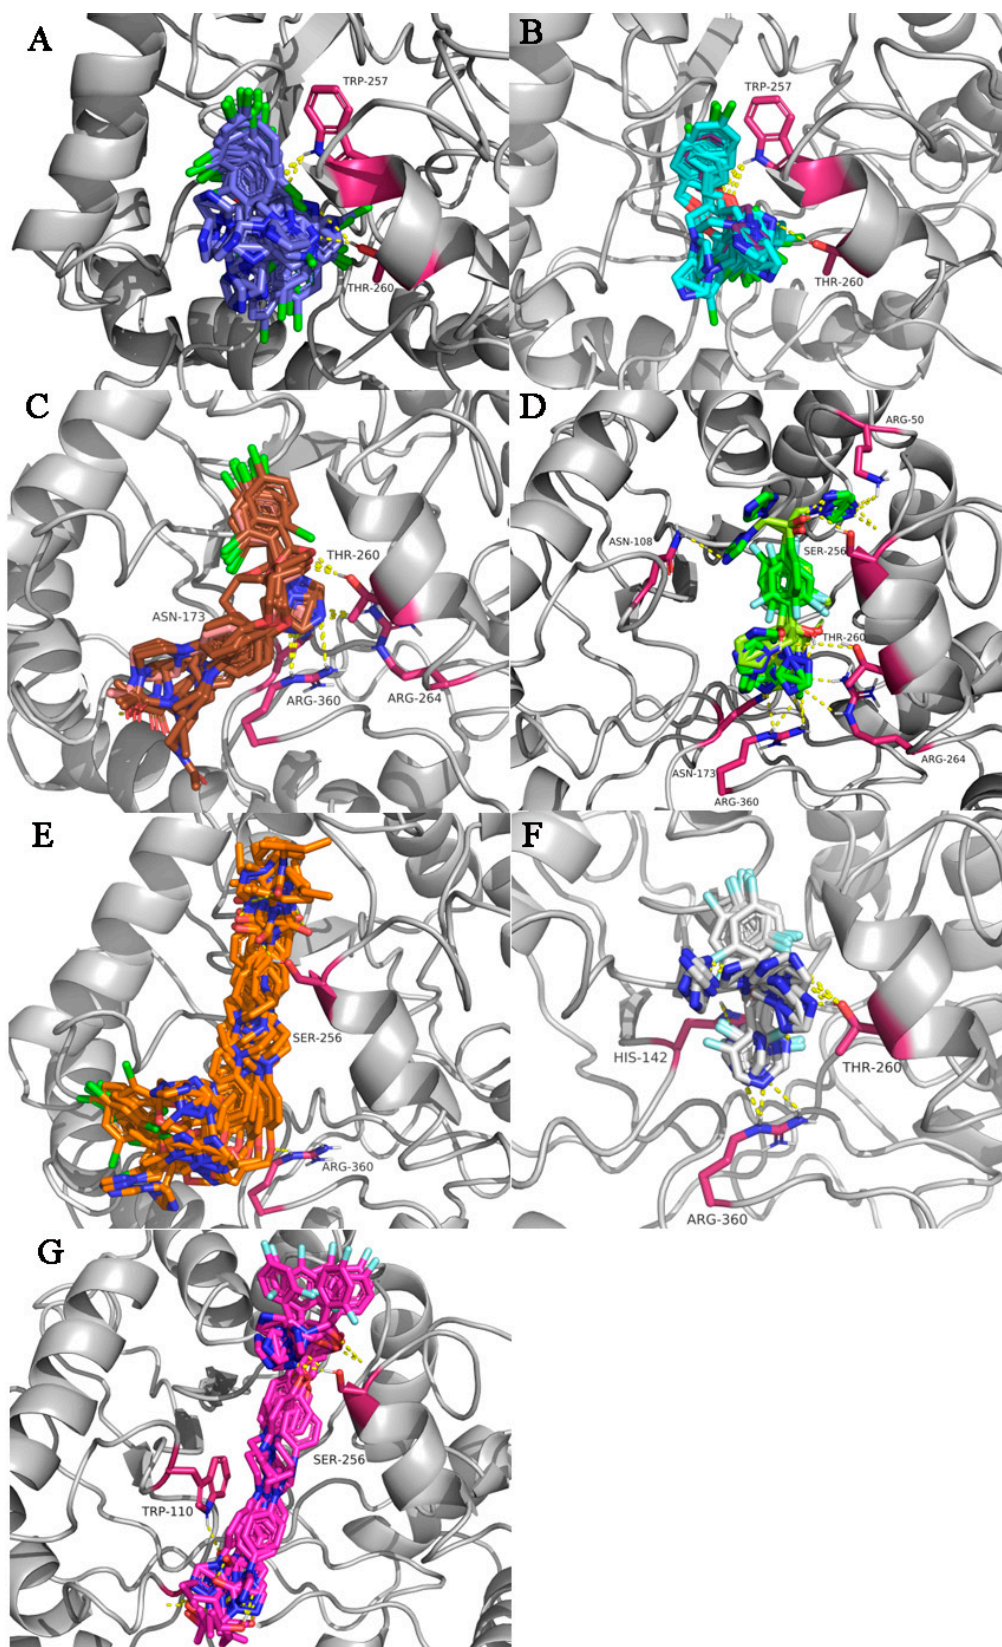

**Figure S10** The hydrogen bonds between the azoles and the residues in AKR7A2.  
A. Miconazole, B. Econazole, C. Ketoconazole, D. Fluconazole, E. Itraconazole, F.  
Voriconazole, G. Posaconazole

**Table S1.** Kinetic parameters of effect of voriconazole on AKR7A2 enzyme activity with SSA as a substrate

| Protein/drug | Drug concentration (μM) | $K_m$ (μM)   | $k_{cat}$ (min <sup>-1</sup> ) | $k_{cat}/K_m$ (min <sup>-1</sup> *μM <sup>-1</sup> ) | Normalized Value ( $k_{cat}/K_m$ ) |
|--------------|-------------------------|--------------|--------------------------------|------------------------------------------------------|------------------------------------|
| AKR7A2       | 0                       | 22.65 ± 1.23 | 74.98 ± 1.48                   | 3.31                                                 | 1.00                               |
| voriconazole | 5                       | 20.44 ± 1.63 | 77.83 ± 2.26                   | 3.81*                                                | 1.15                               |
| voriconazole | 20                      | 18.99 ± 1.02 | 78.36 ± 1.44                   | 4.13**                                               | 1.25                               |
| voriconazole | 50                      | 17.30 ± 0.88 | 79.54 ± 1.33                   | 4.60***                                              | 1.39                               |

\*  $p < 0.05$ , \*\*  $p < 0.01$ , \*\*\*  $p < 0.001$ . The data represents the mean ±SD of at least three replicates and were analyzed by GraphPad Prism 8.0.
